# Supplementary material for: Prognostic Value of Preoperative ICPI in Rectal Cancer: A Nomogram Based Approach
Source: Research Square preprint supplement (doi:10.21203/rs.3.rs-7234131/v1), 2025-09-09
Supplement: Supplementary file 1 [file 4417da54f90a2de4b2830cba.xlsx]

## Sheet: Sheet1
Table 2 Validation of multi-factor Cox regression analysis using variables selected by machine learning.
Variables	HR (95%CI)	P
Age	1.02 (1.01 ~ 1.04)	0.036
Differentiation type
High
Middle	0.83 (0.19 ~ 3.50)	0.795
Low	1.58 (0.35 ~ 7.12)	0.553
pN stage
0
1	1.23 (0.72 ~ 2.11)	0.455
2	2.88 (1.55 ~ 5.37)	<.001
CEA
＞5 µg/L
≤5 µg/L	2.78 (1.77 ~ 4.39)	<.001
Surgical time
＞240 min
≤240 min	2.39 (1.49 ~ 3.84)	<.001
ICPI
＞4.3
≤4.3	2.73 (1.67 ~ 4.47)	<.001
ICPI: Inflammation-Combined Prognostic Index; CEA: carcinoembryonic antigen
