# Supplementary material for: Prognostic Value of Preoperative ICPI in Rectal Cancer: A Nomogram Based Approach
Source: Research Square preprint supplement (doi:10.21203/rs.3.rs-7234131/v1), 2025-09-09
Supplement: Supplementary file 2 [file ce976d3e3e7735b4028f4b9c.docx]

**Supplementary Figure**


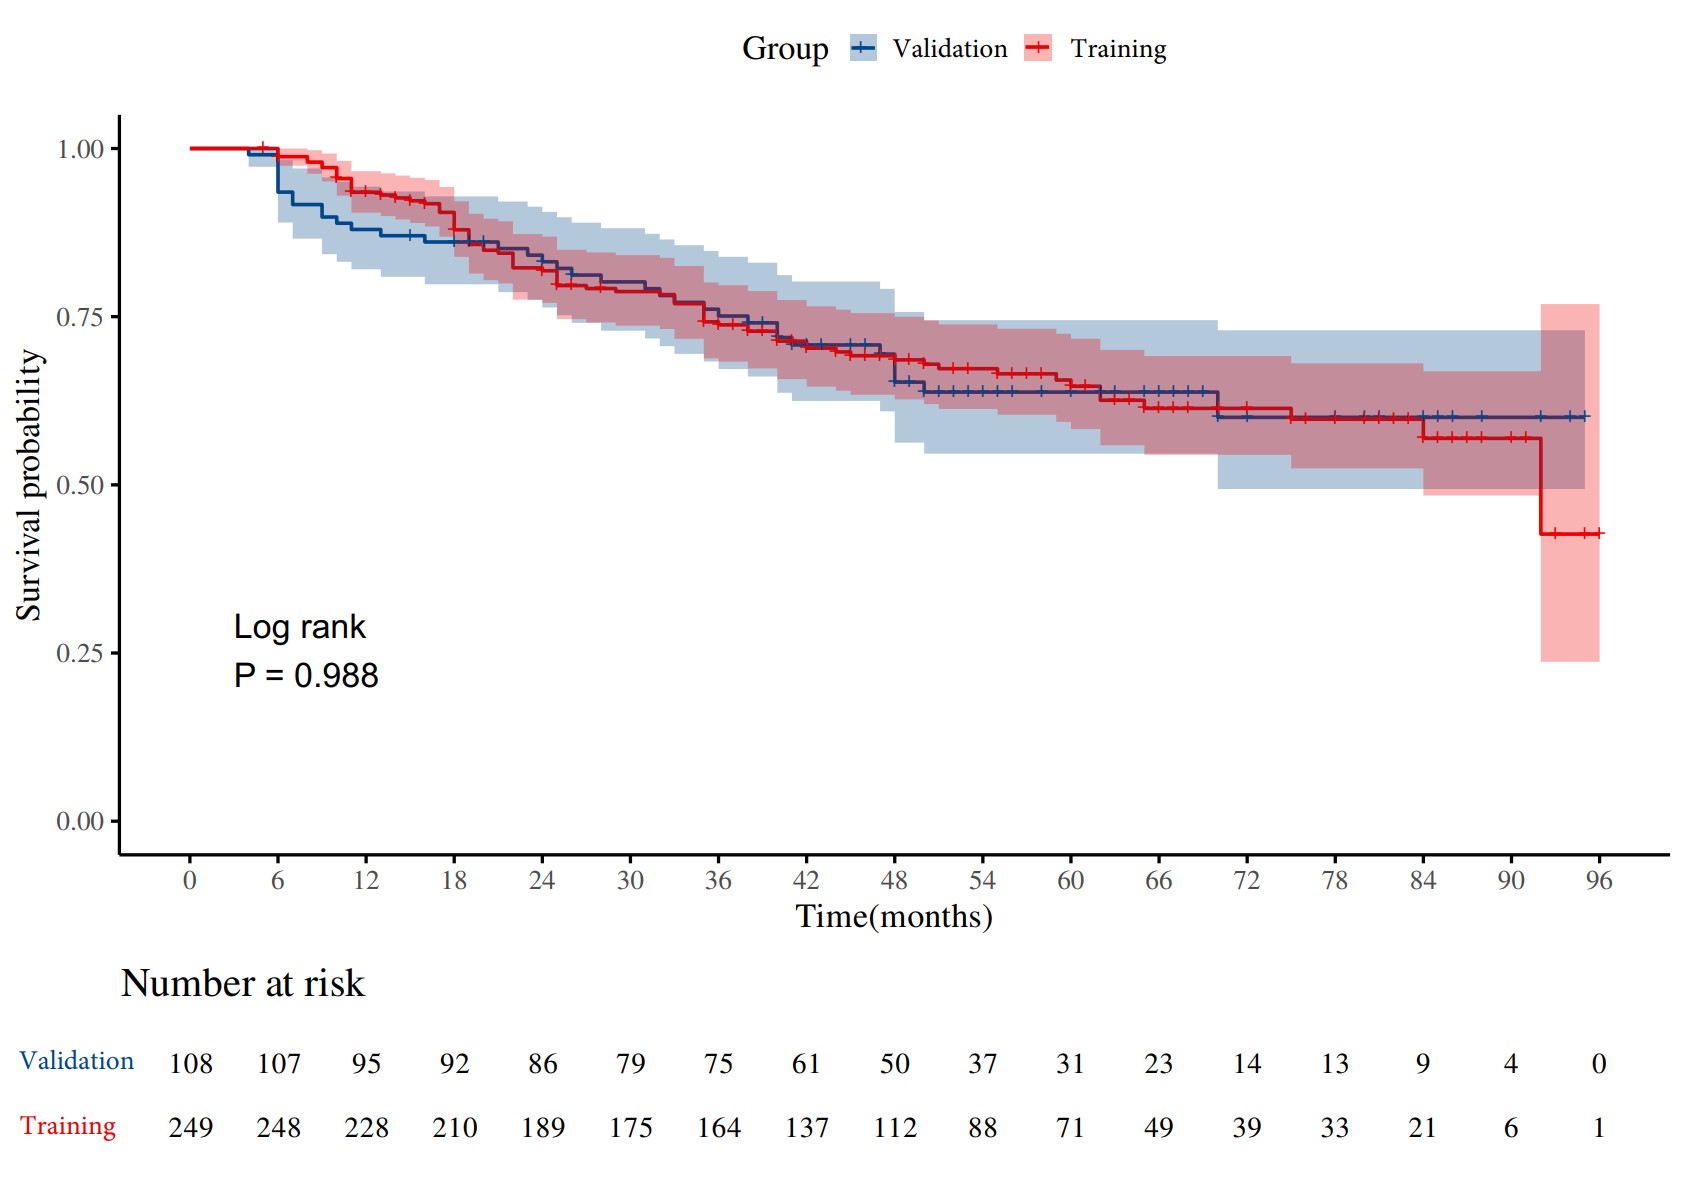


**Supplementary Figure S1** The Kaplan-Meier survival curves for overall survival in rectal cancer patients from the training cohort and the validation cohort.


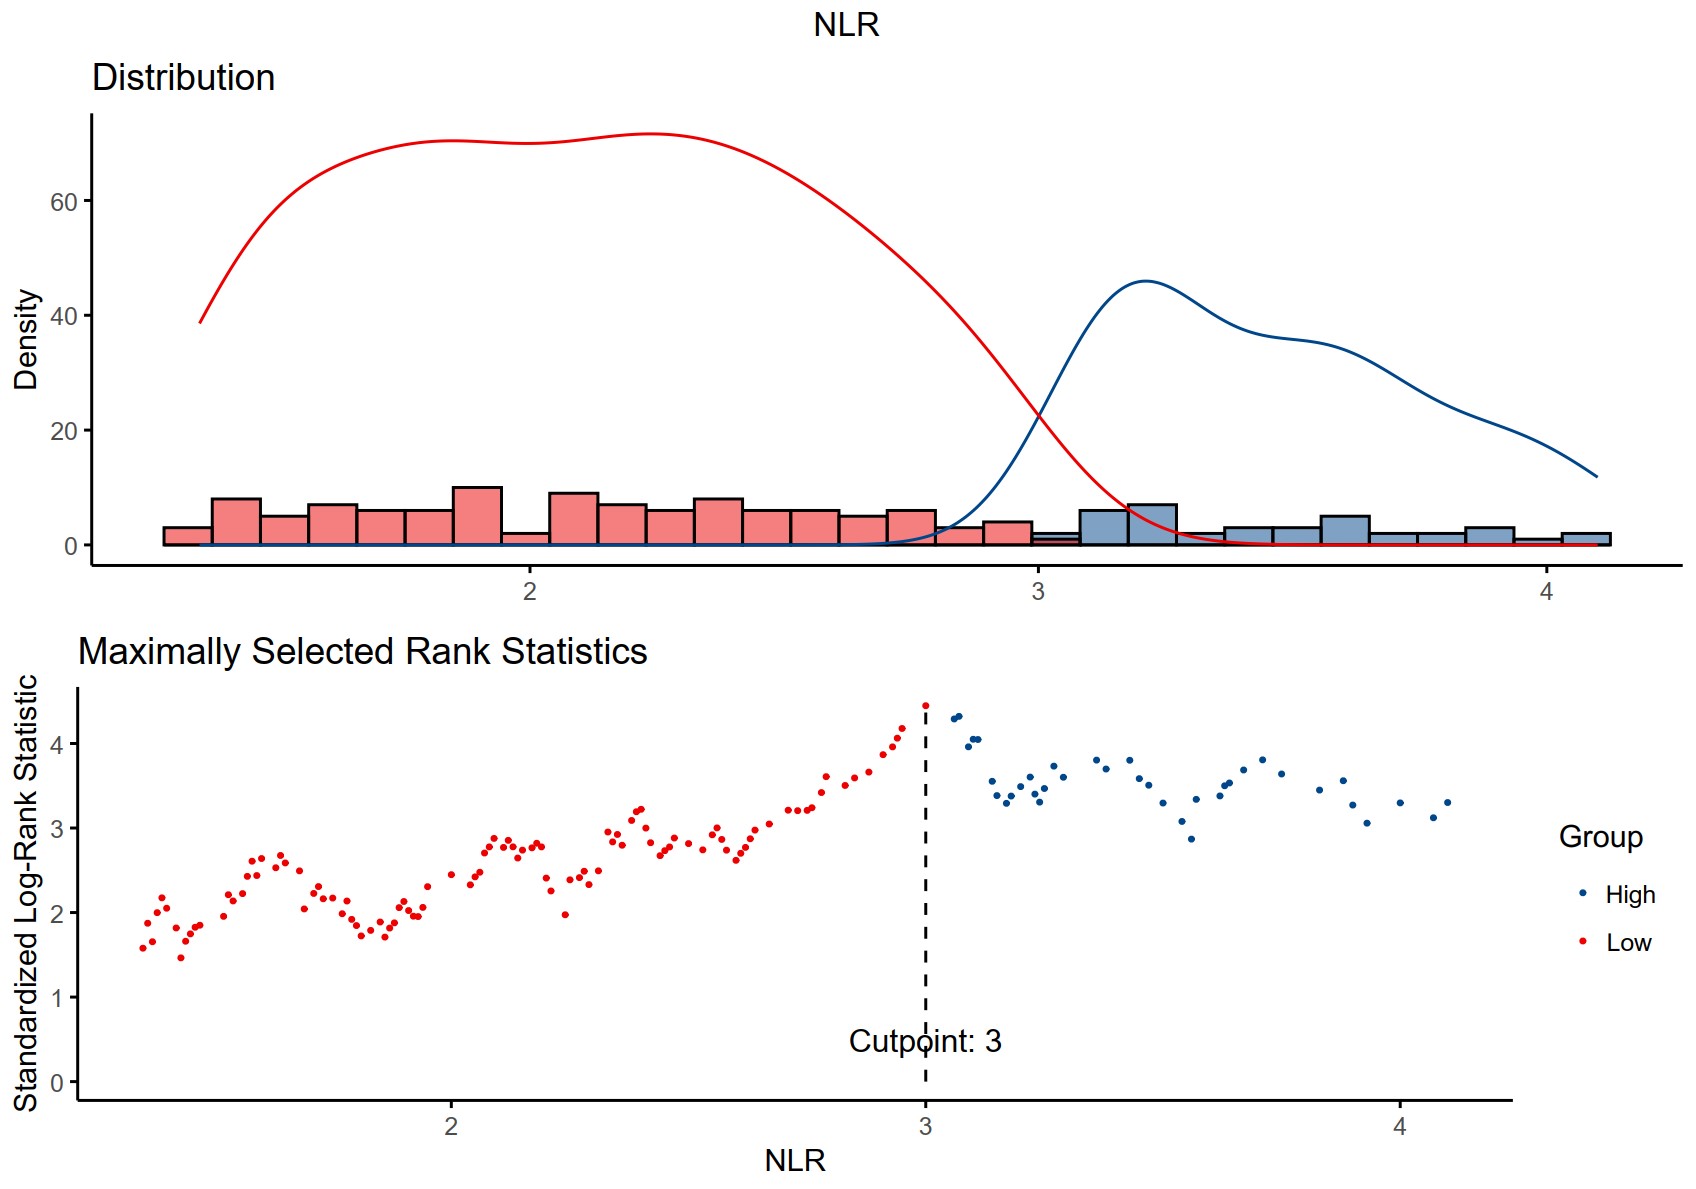
 **
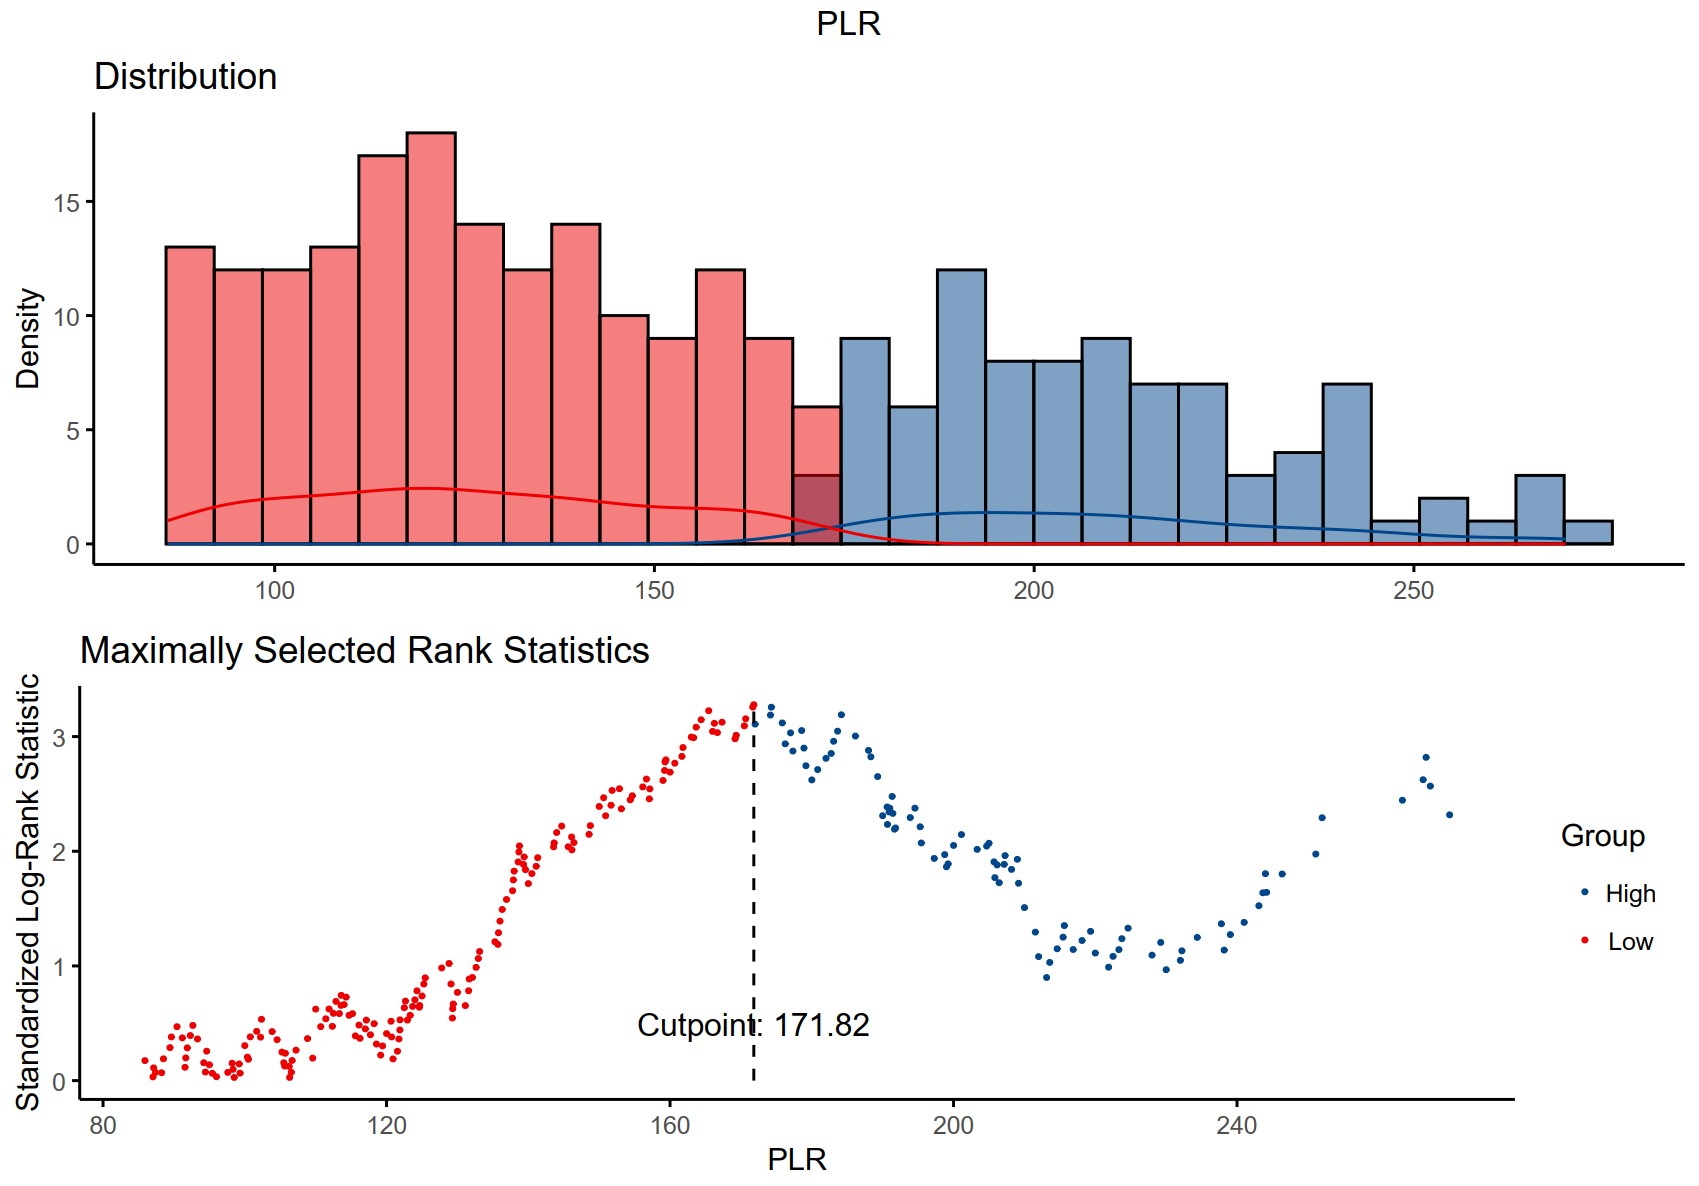
**

(**A**) (**B**)


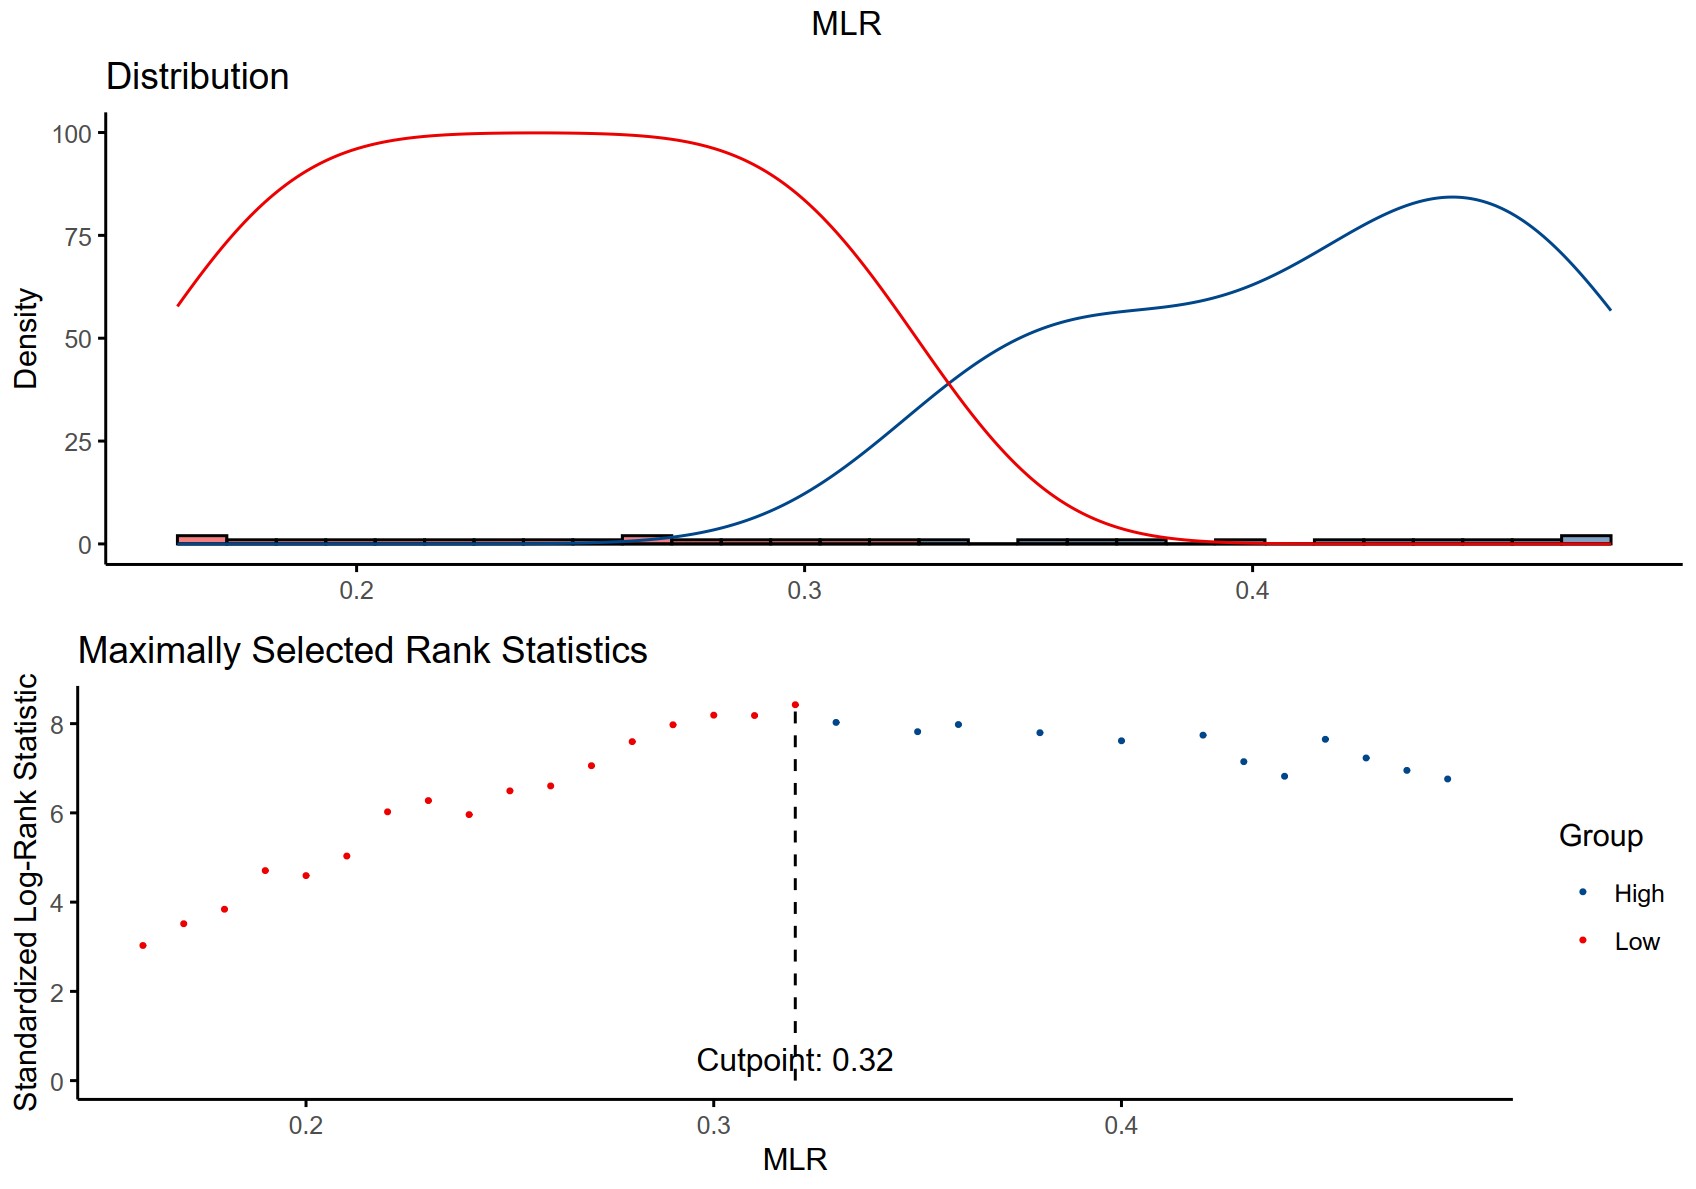

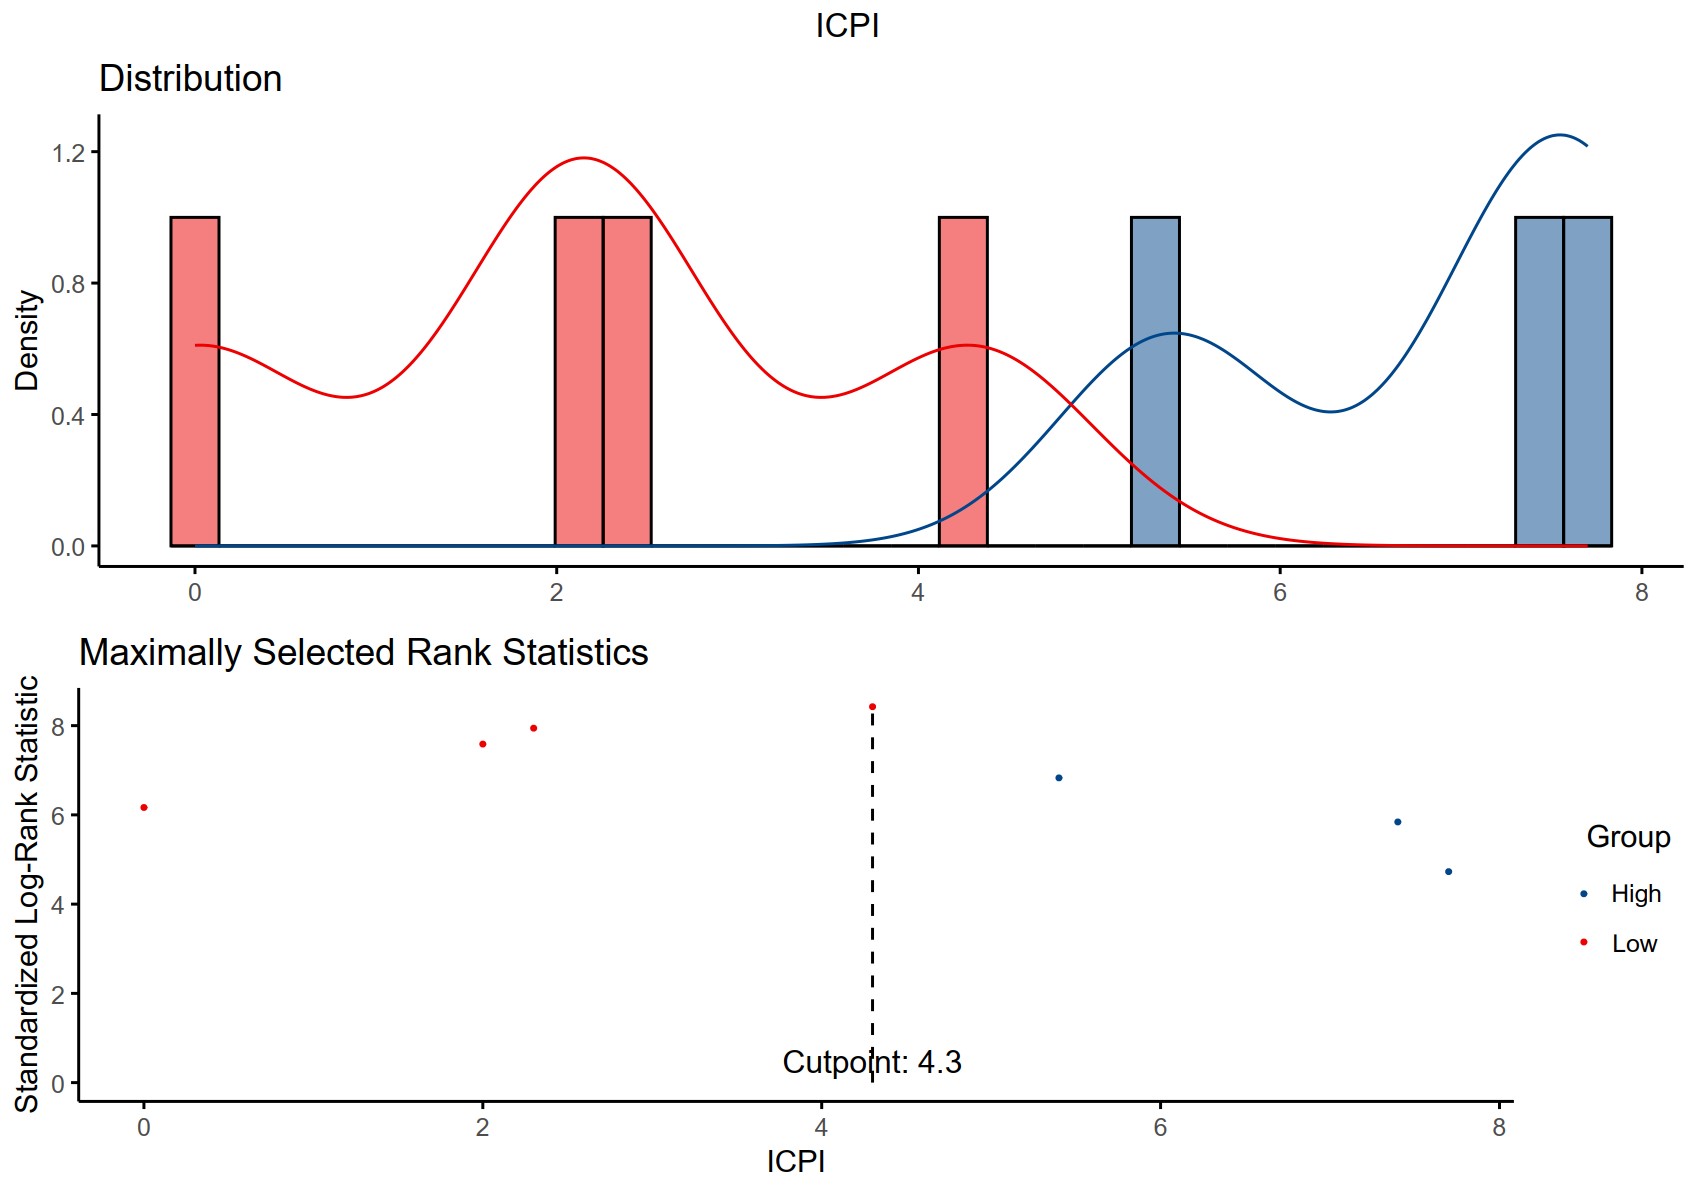


(**C**) (**D**)

**Supplementary Figure S2** Cut-off of NLR (A), PLR (B), MLR(C) and ICPI(D) in patients with rectal cancer.


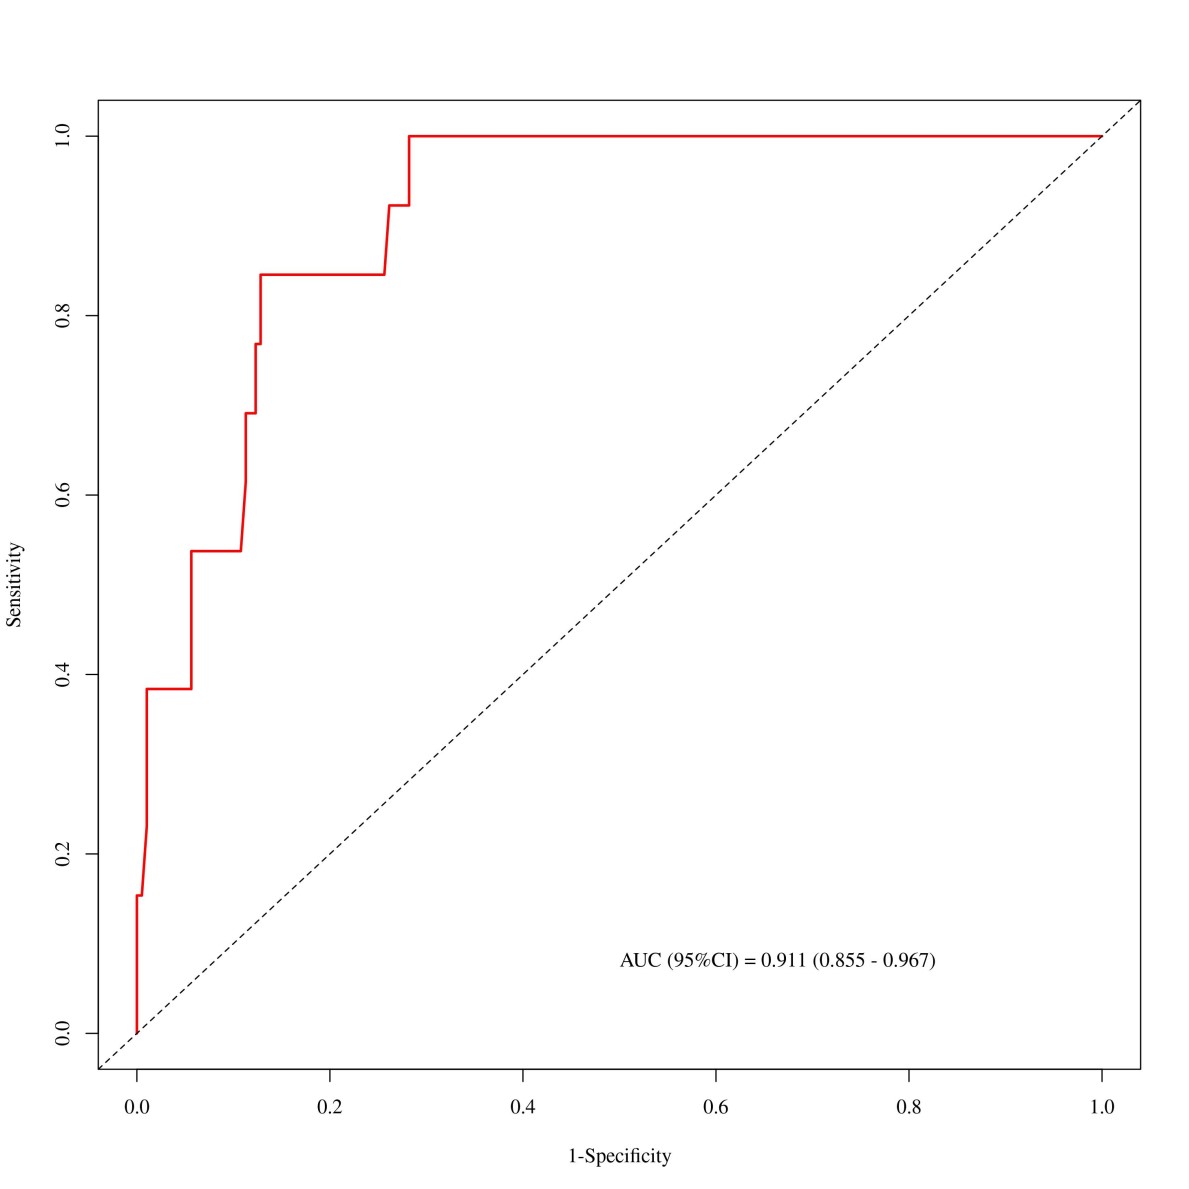

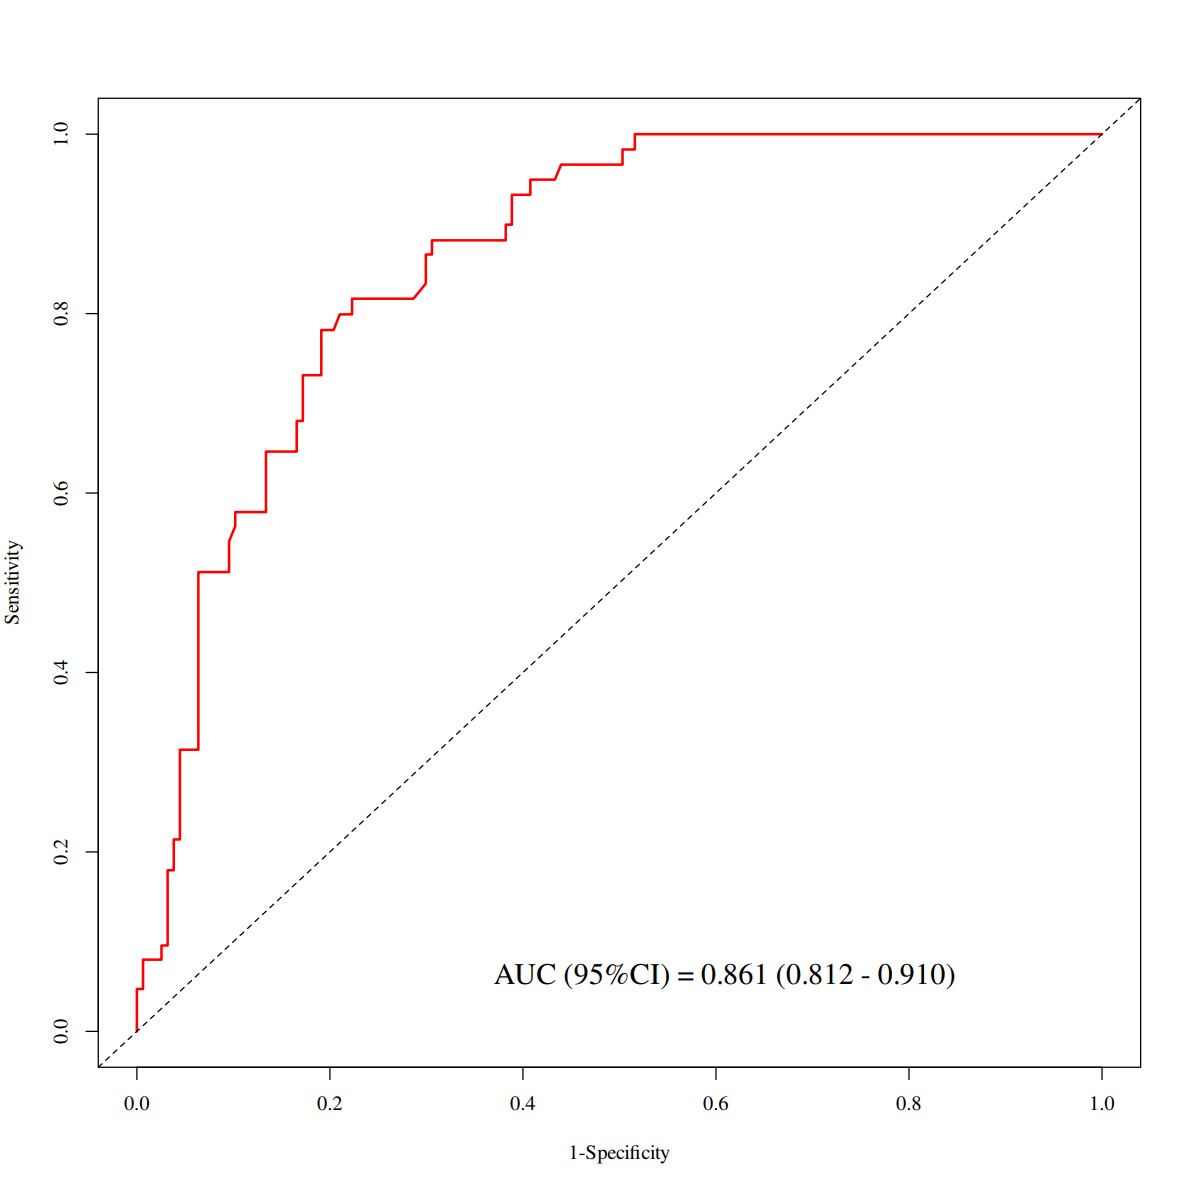

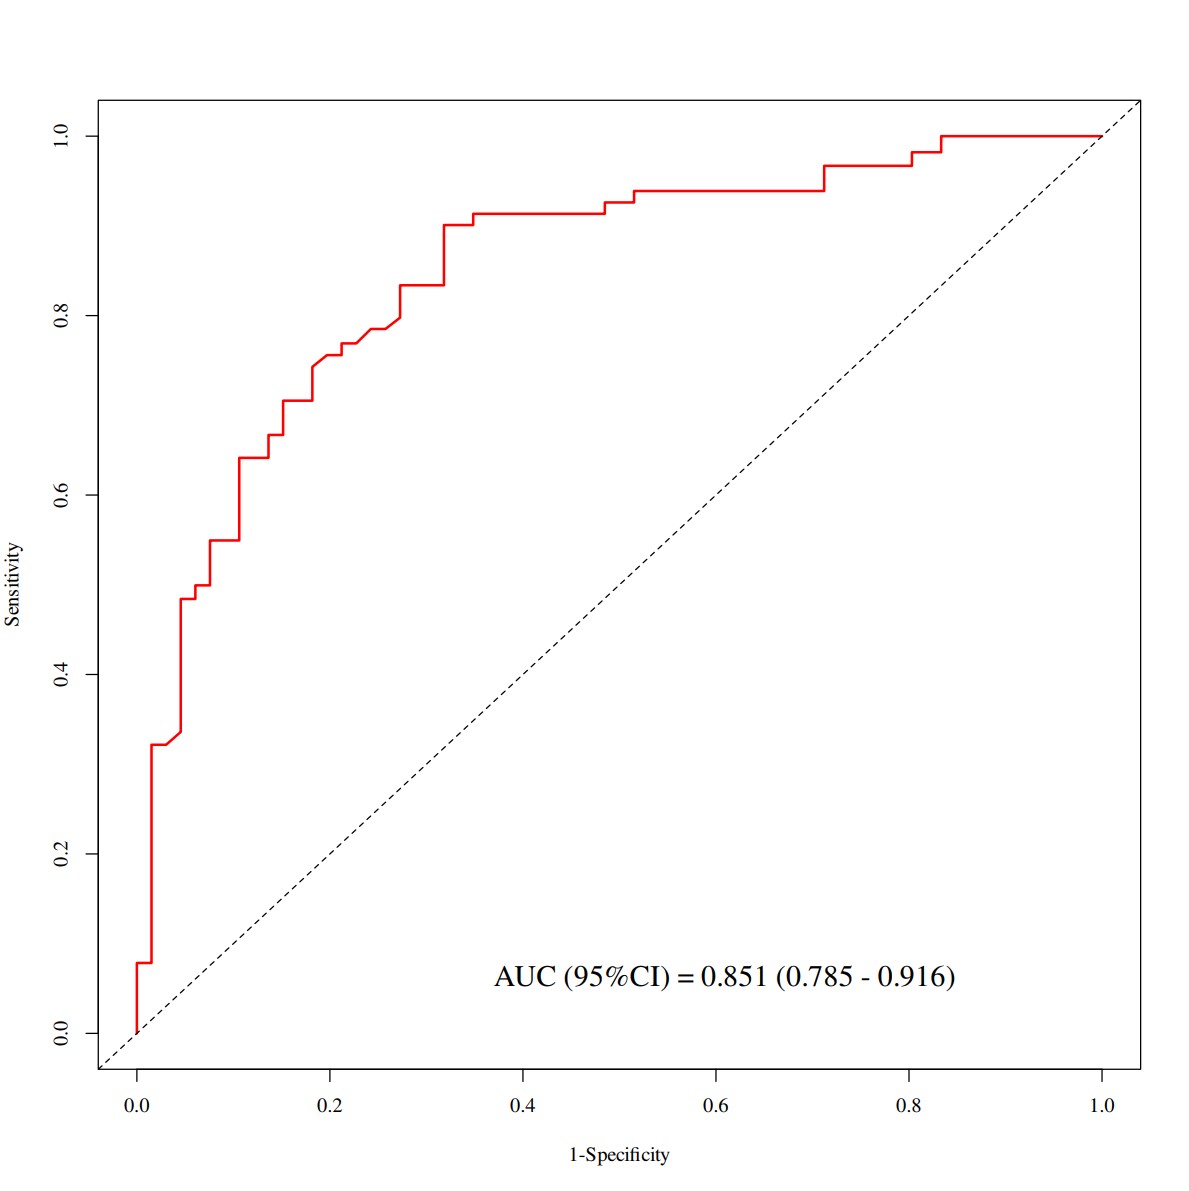


(**A**) (**B**) (**C**)

**Supplementary Figure S3** The nomogram ROC curves for predicting 1- (A), 3- (B), and 5 (C) OS in patients with rectal cancer in the training cohort.


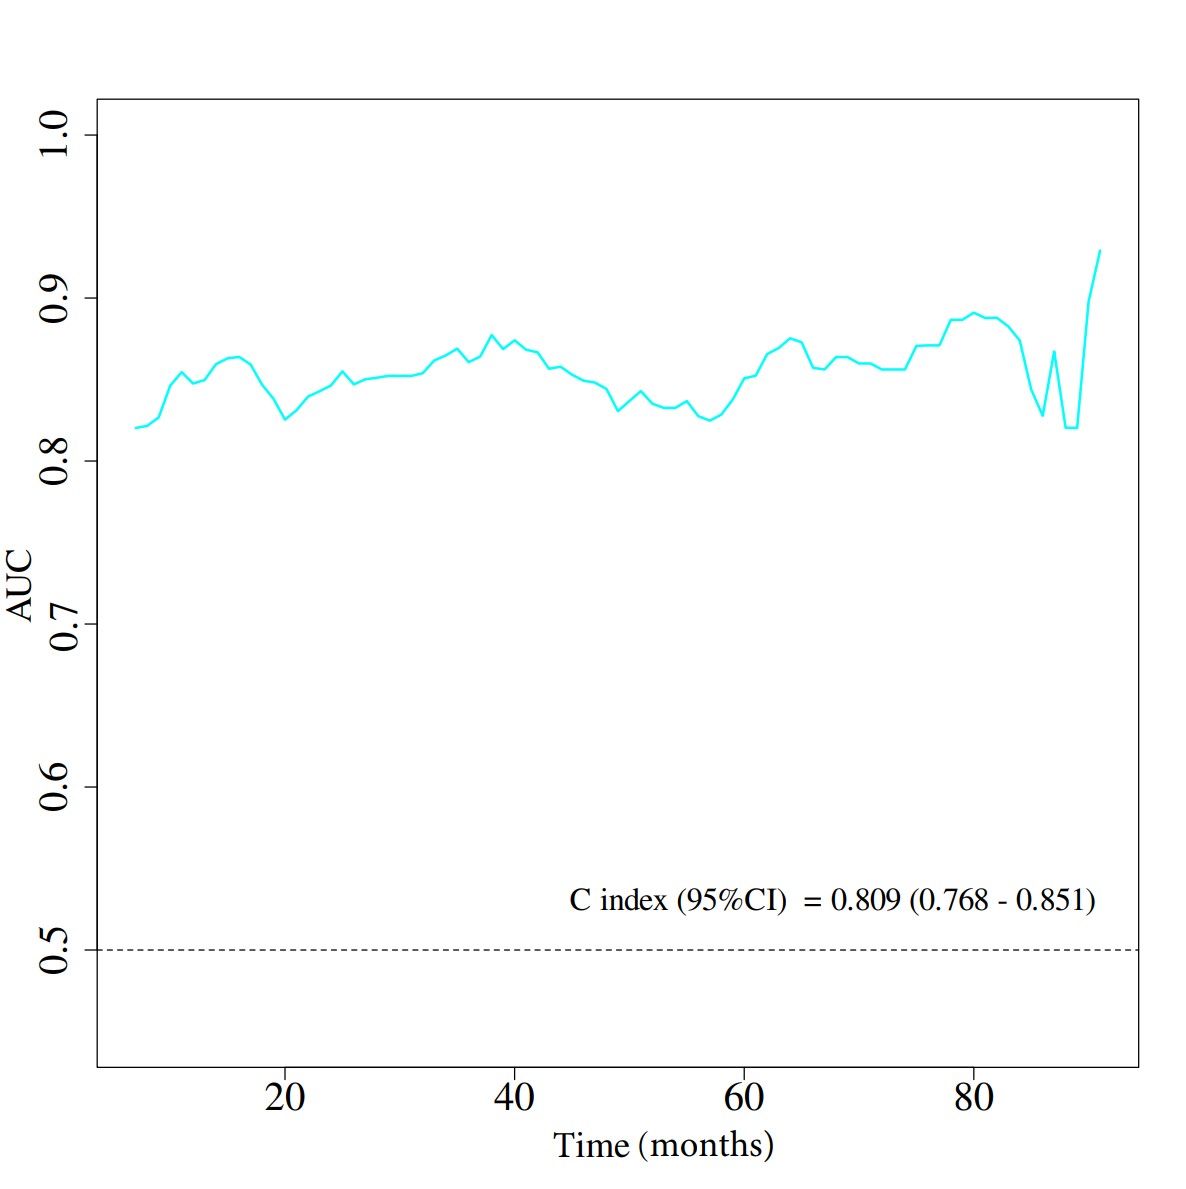

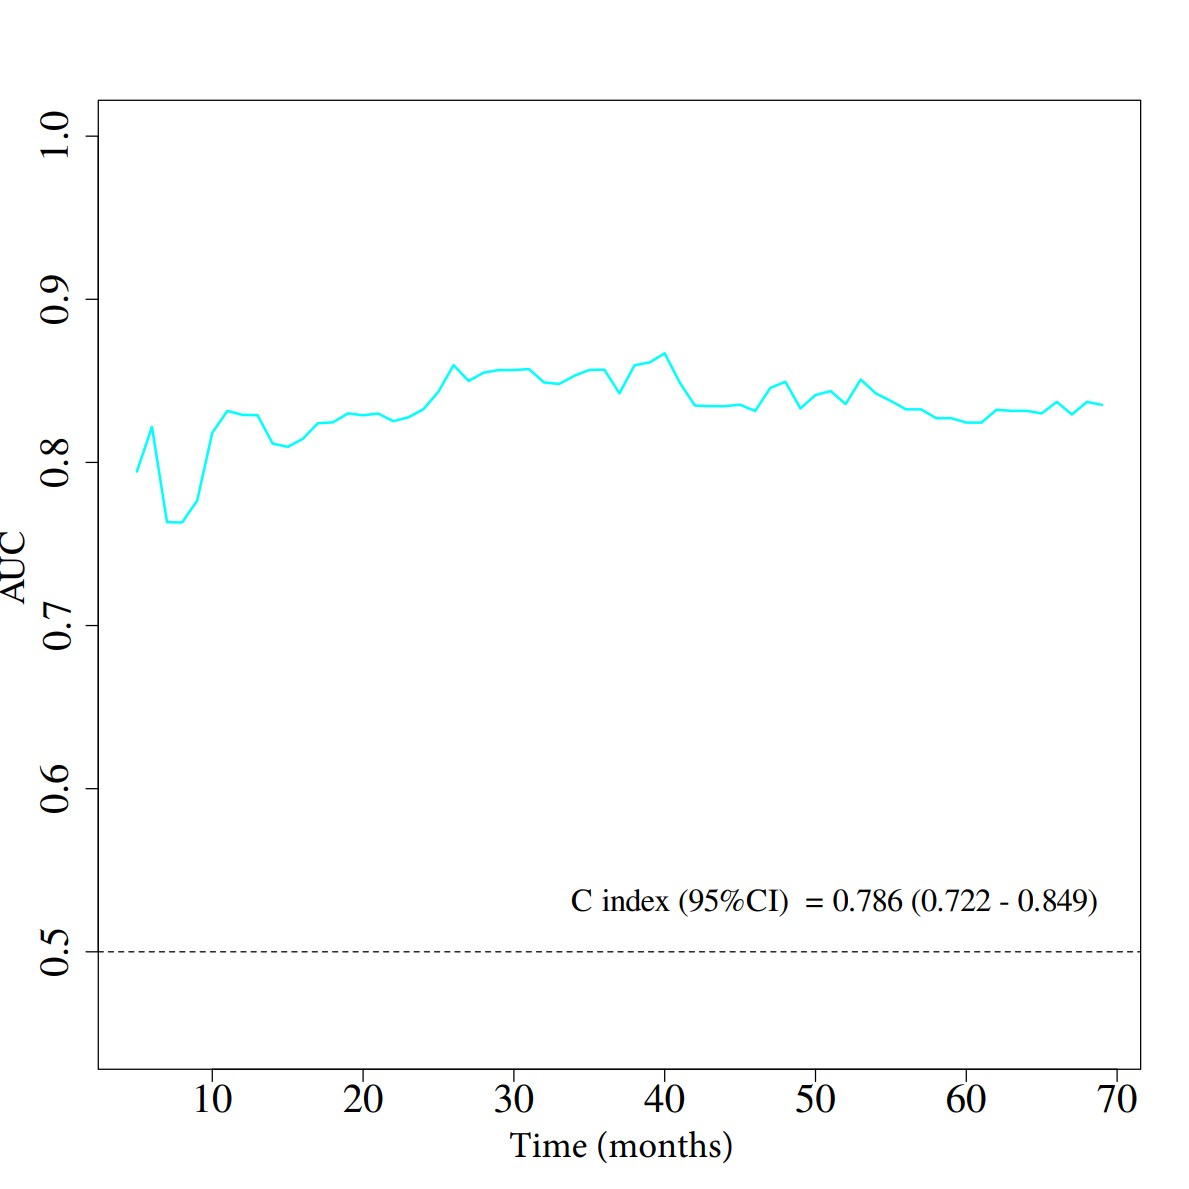


(**A**) (**B**)

**Supplementary Figure S4** The time-dependent ROC curves in the training(A) and validation(B) cohorts.


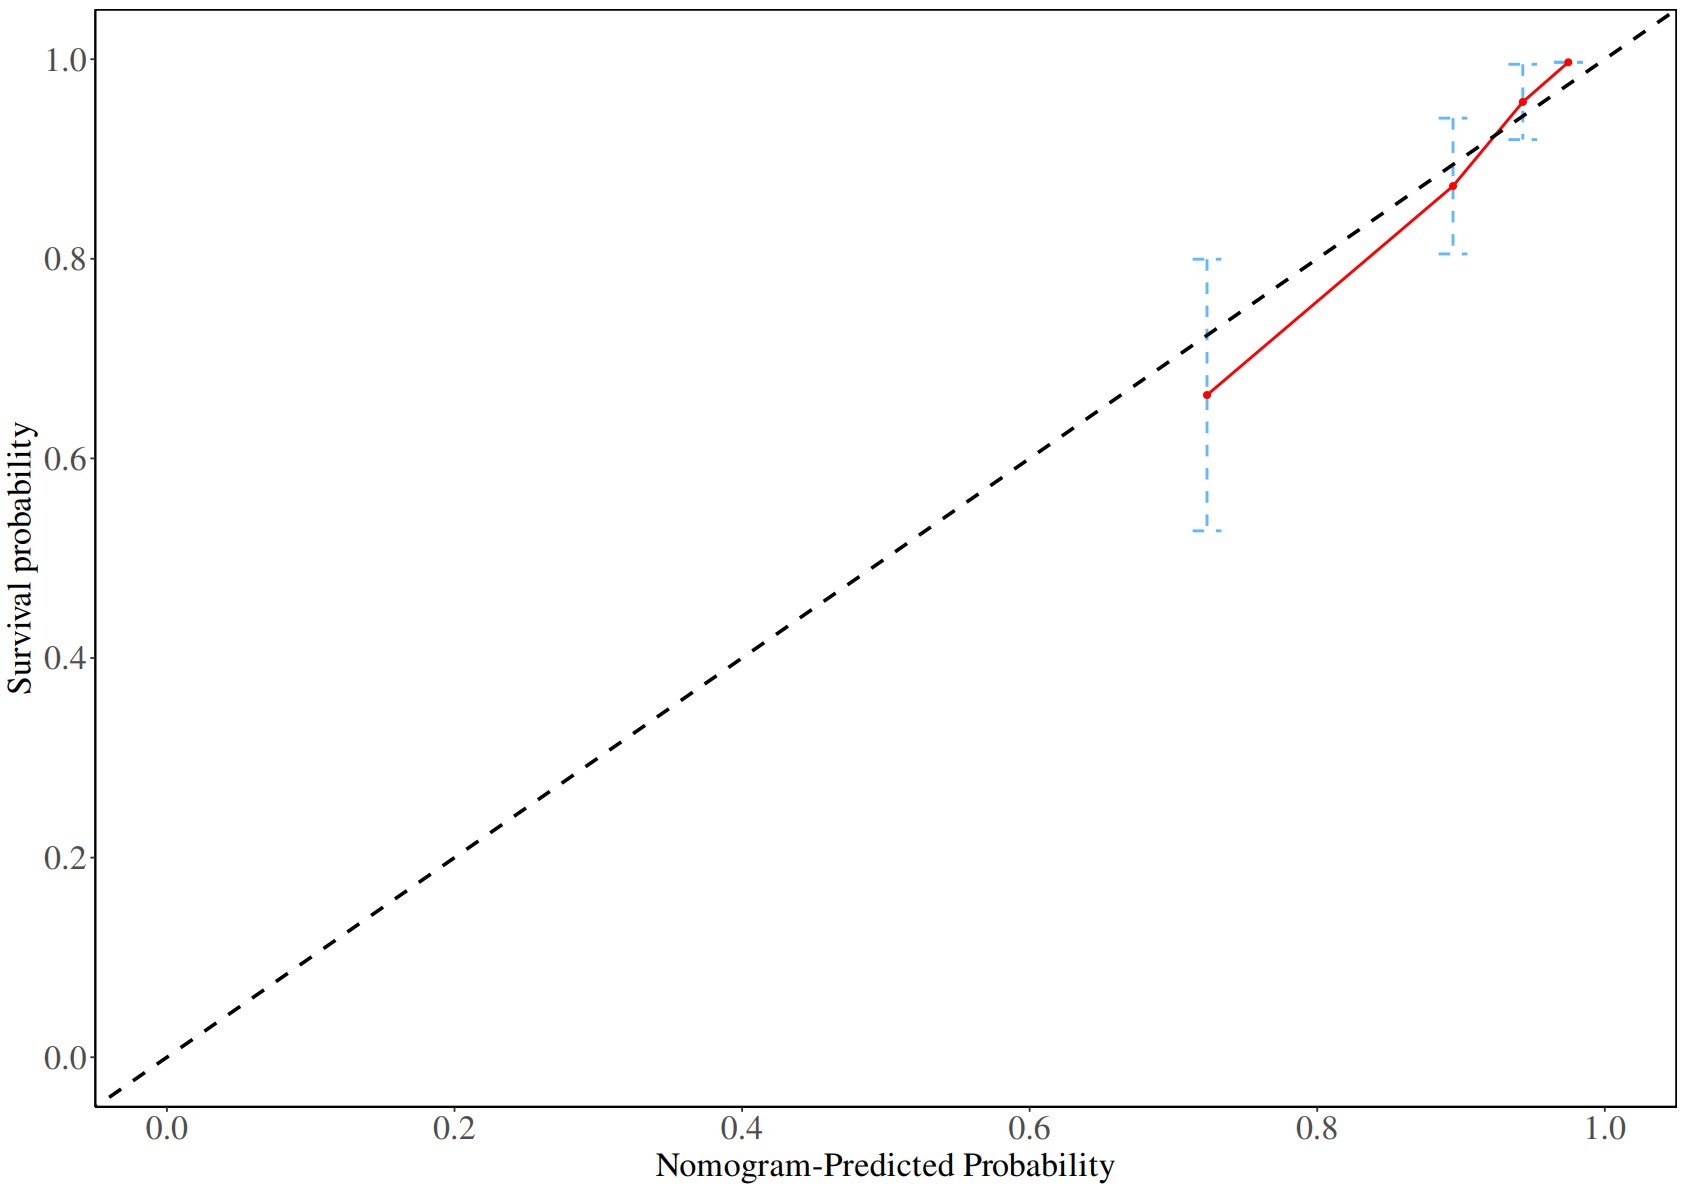

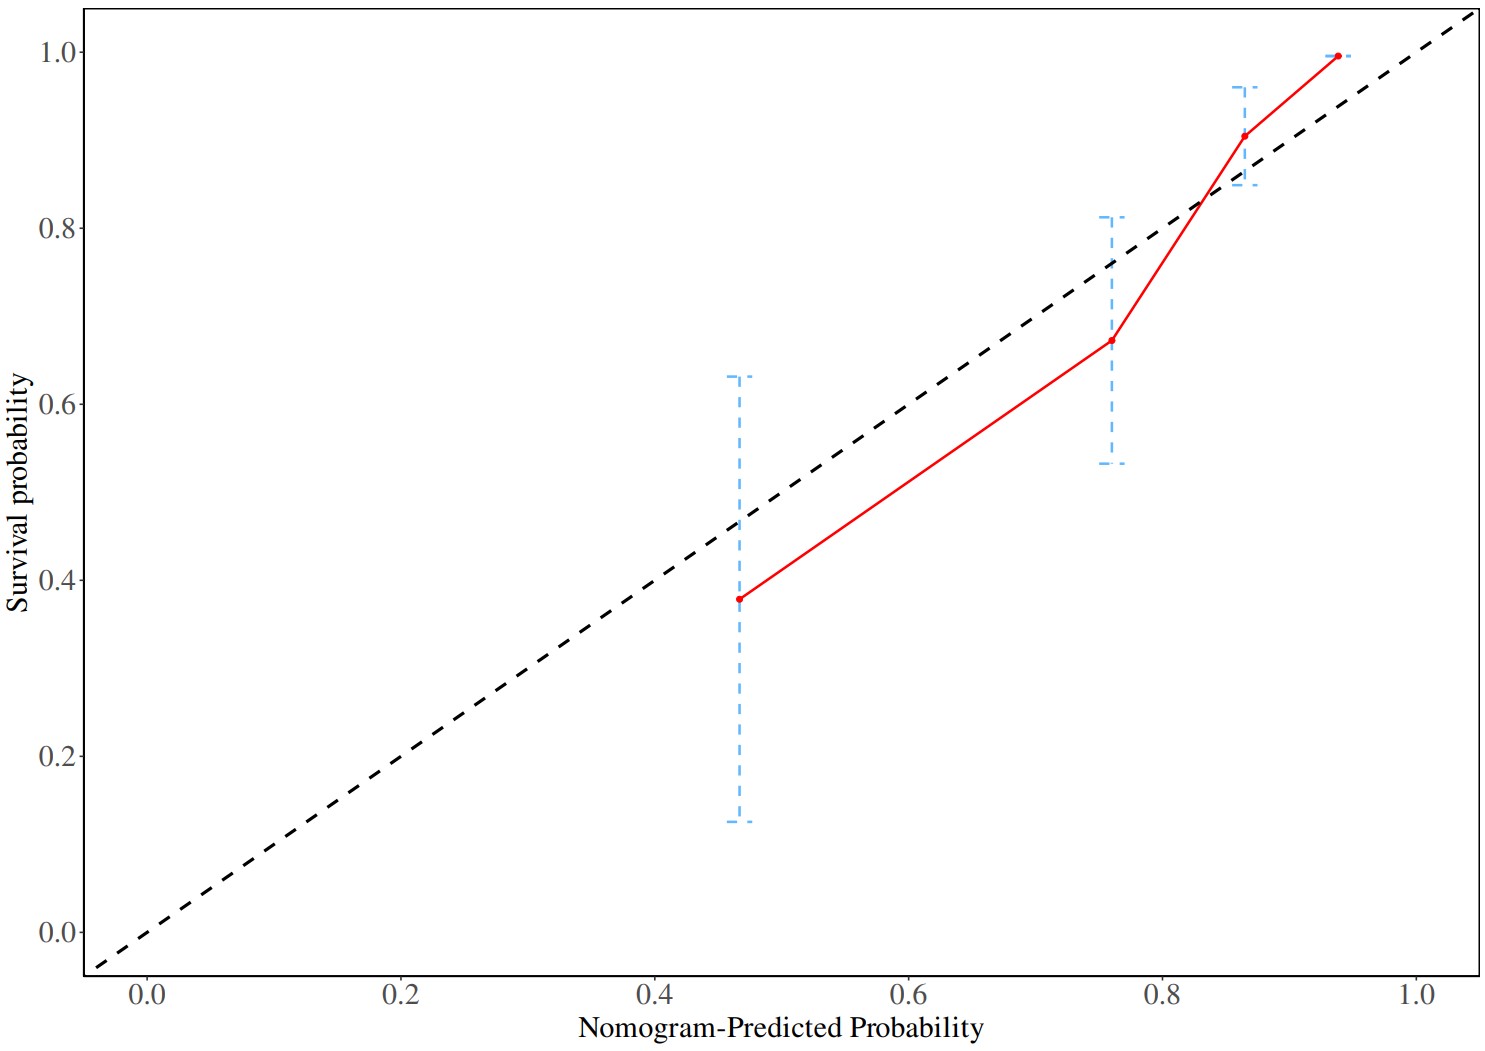

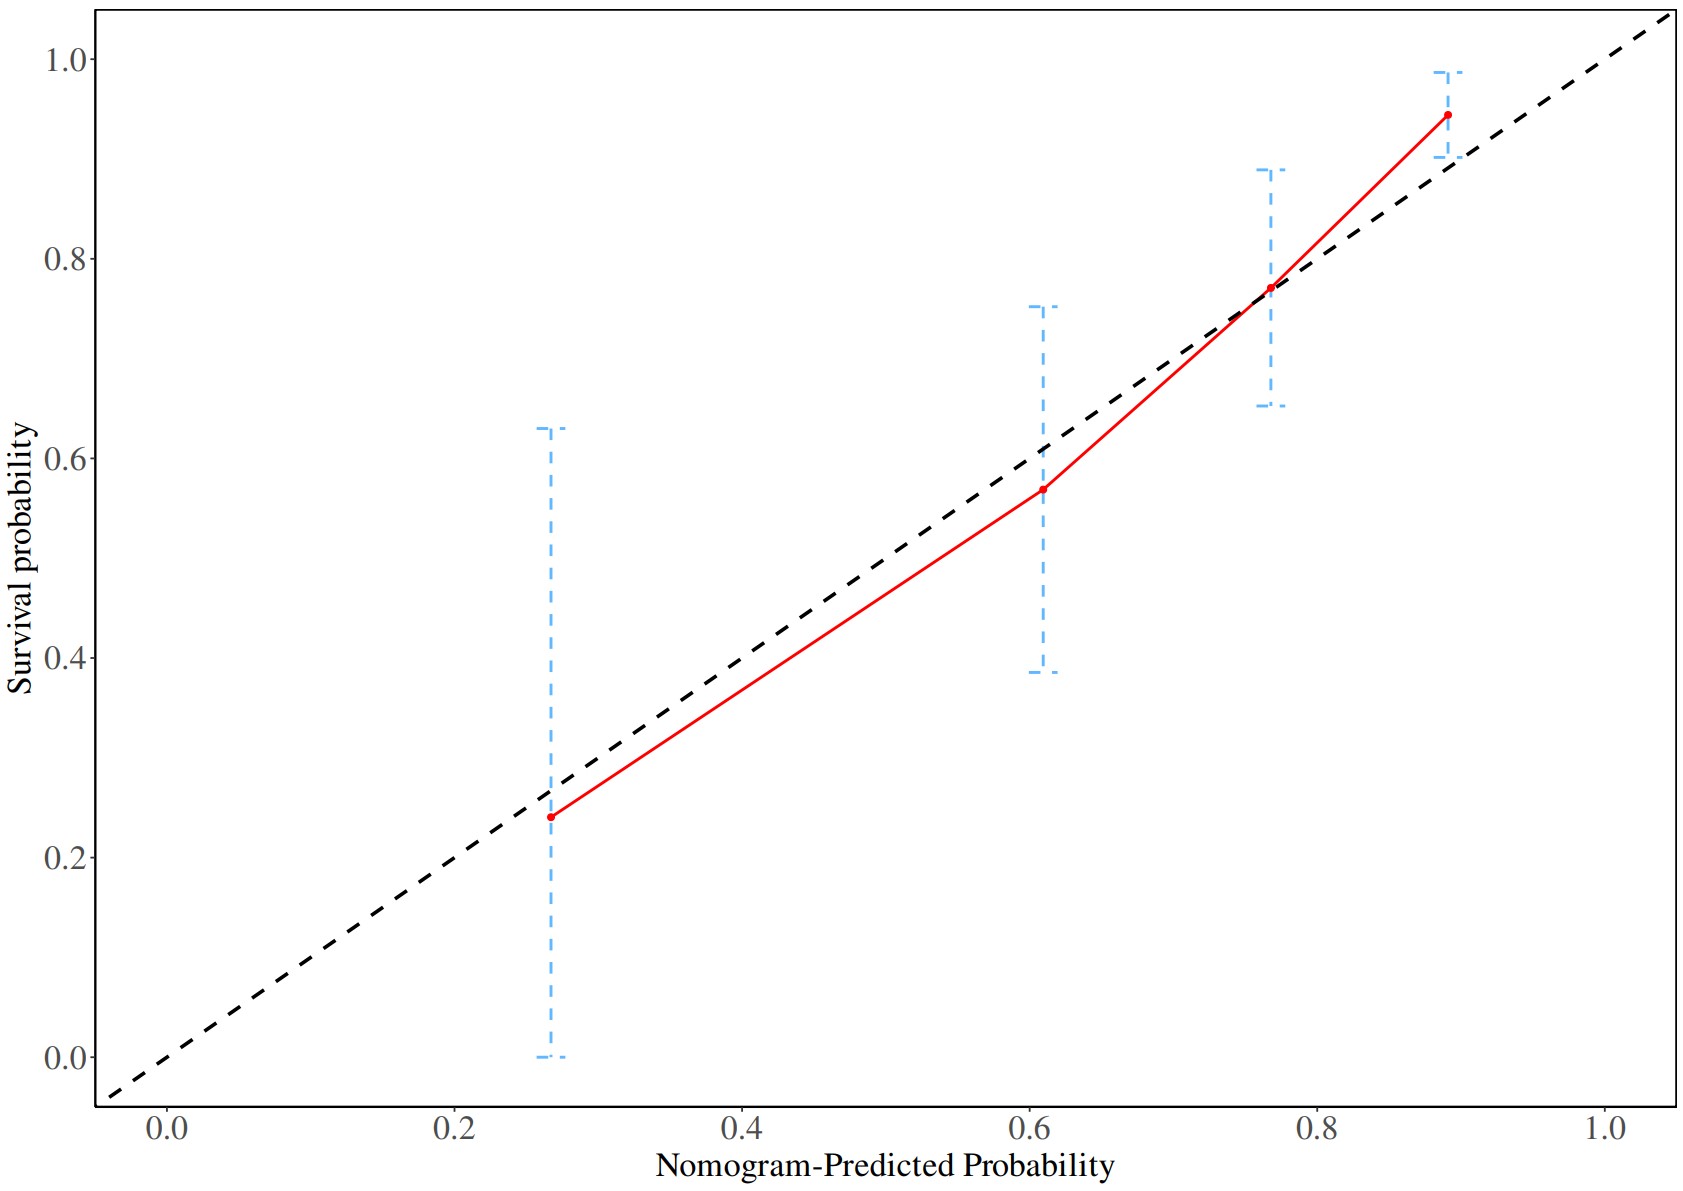


(**A**) (**B**) (**C**)

**Supplementary Figure S5** The calibration curves for 1- (A), 3- (B), and 5-year (C) OS in the training cohort. The solid line indicates the performance of the prediction model, and the closer to the diagonal dashed line, the more accurate the prediction.


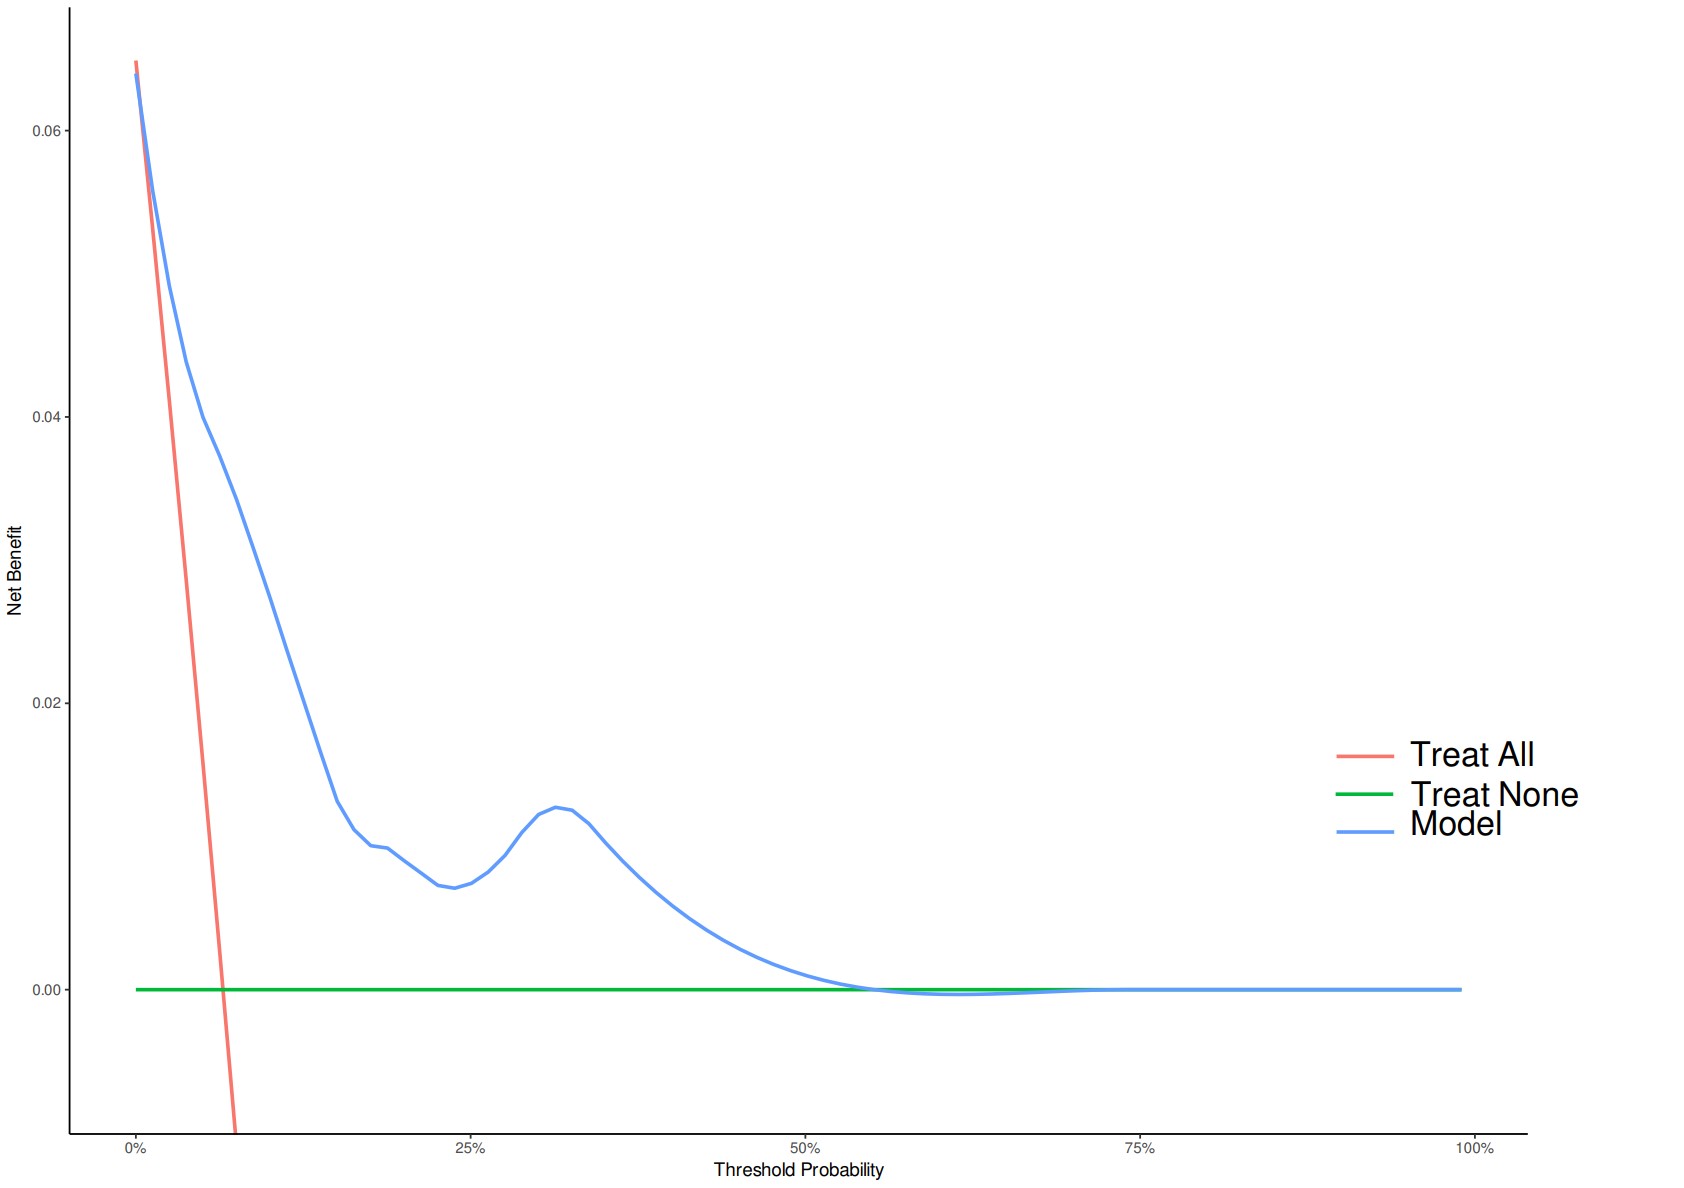

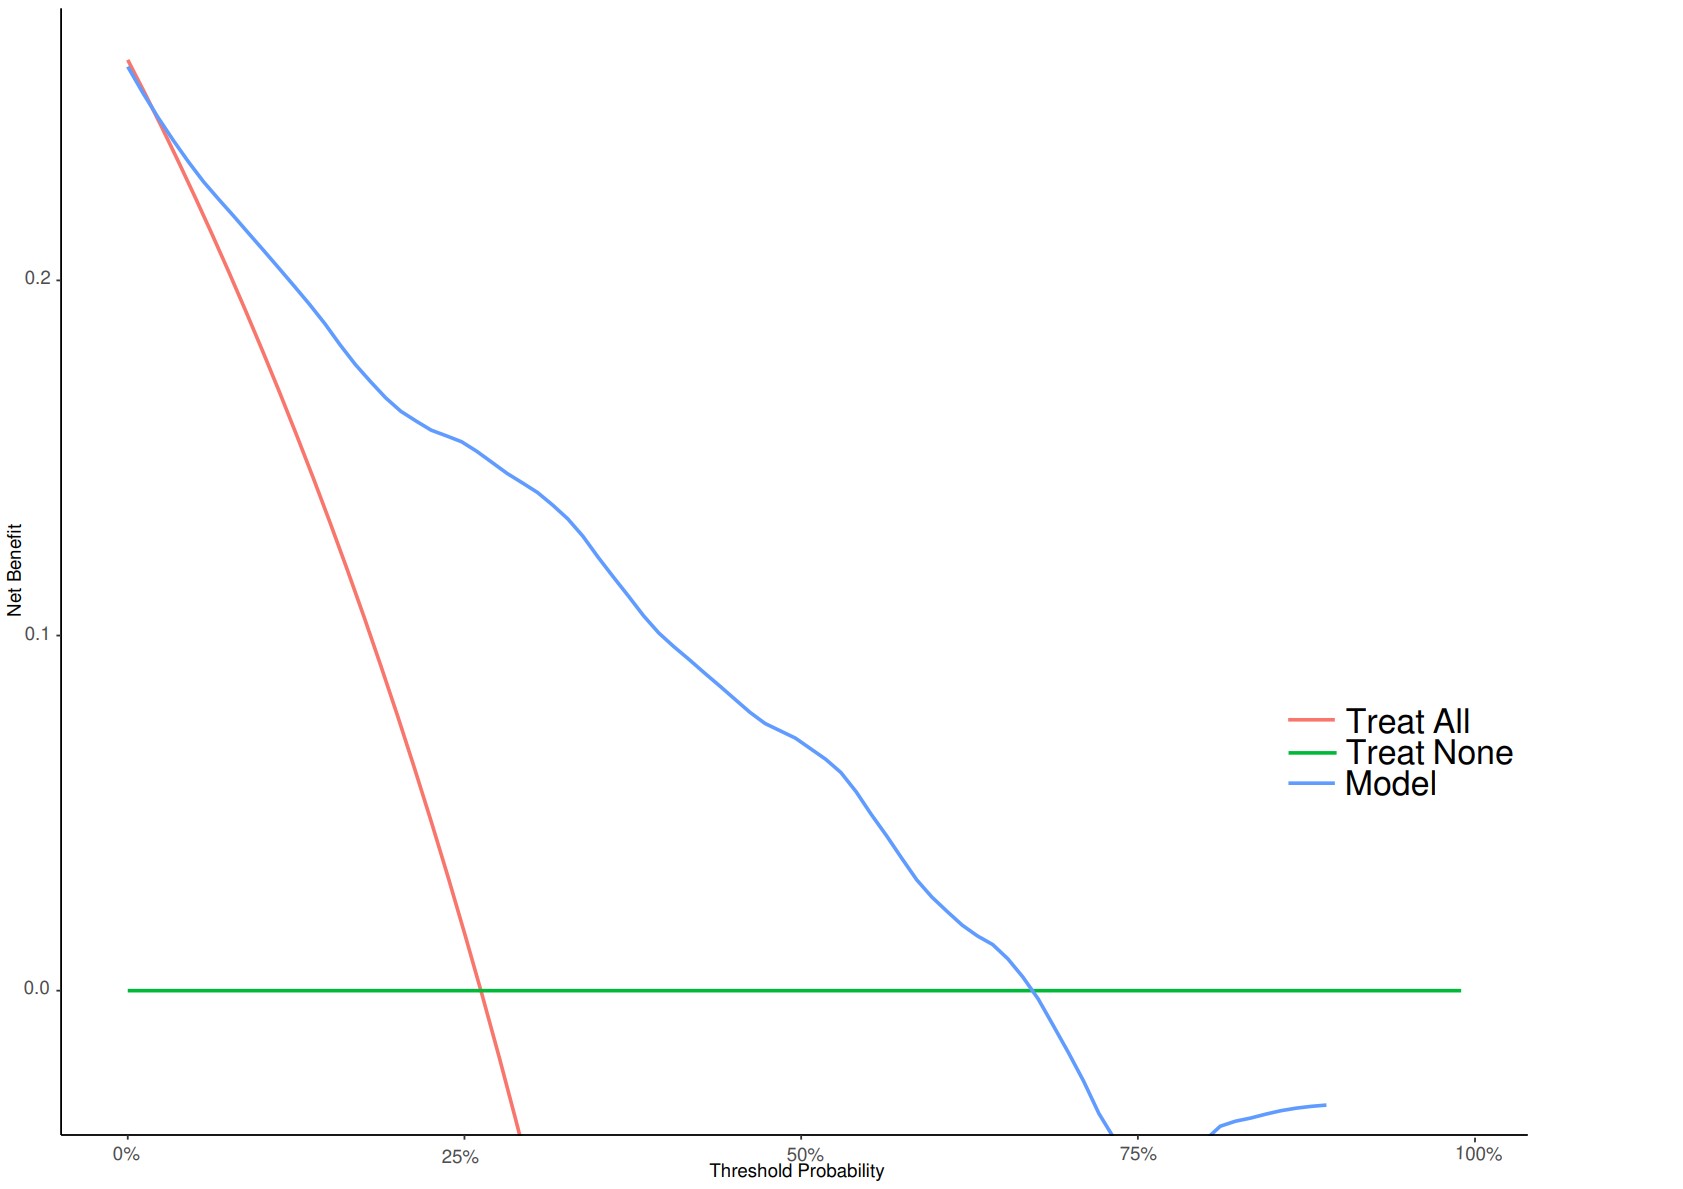

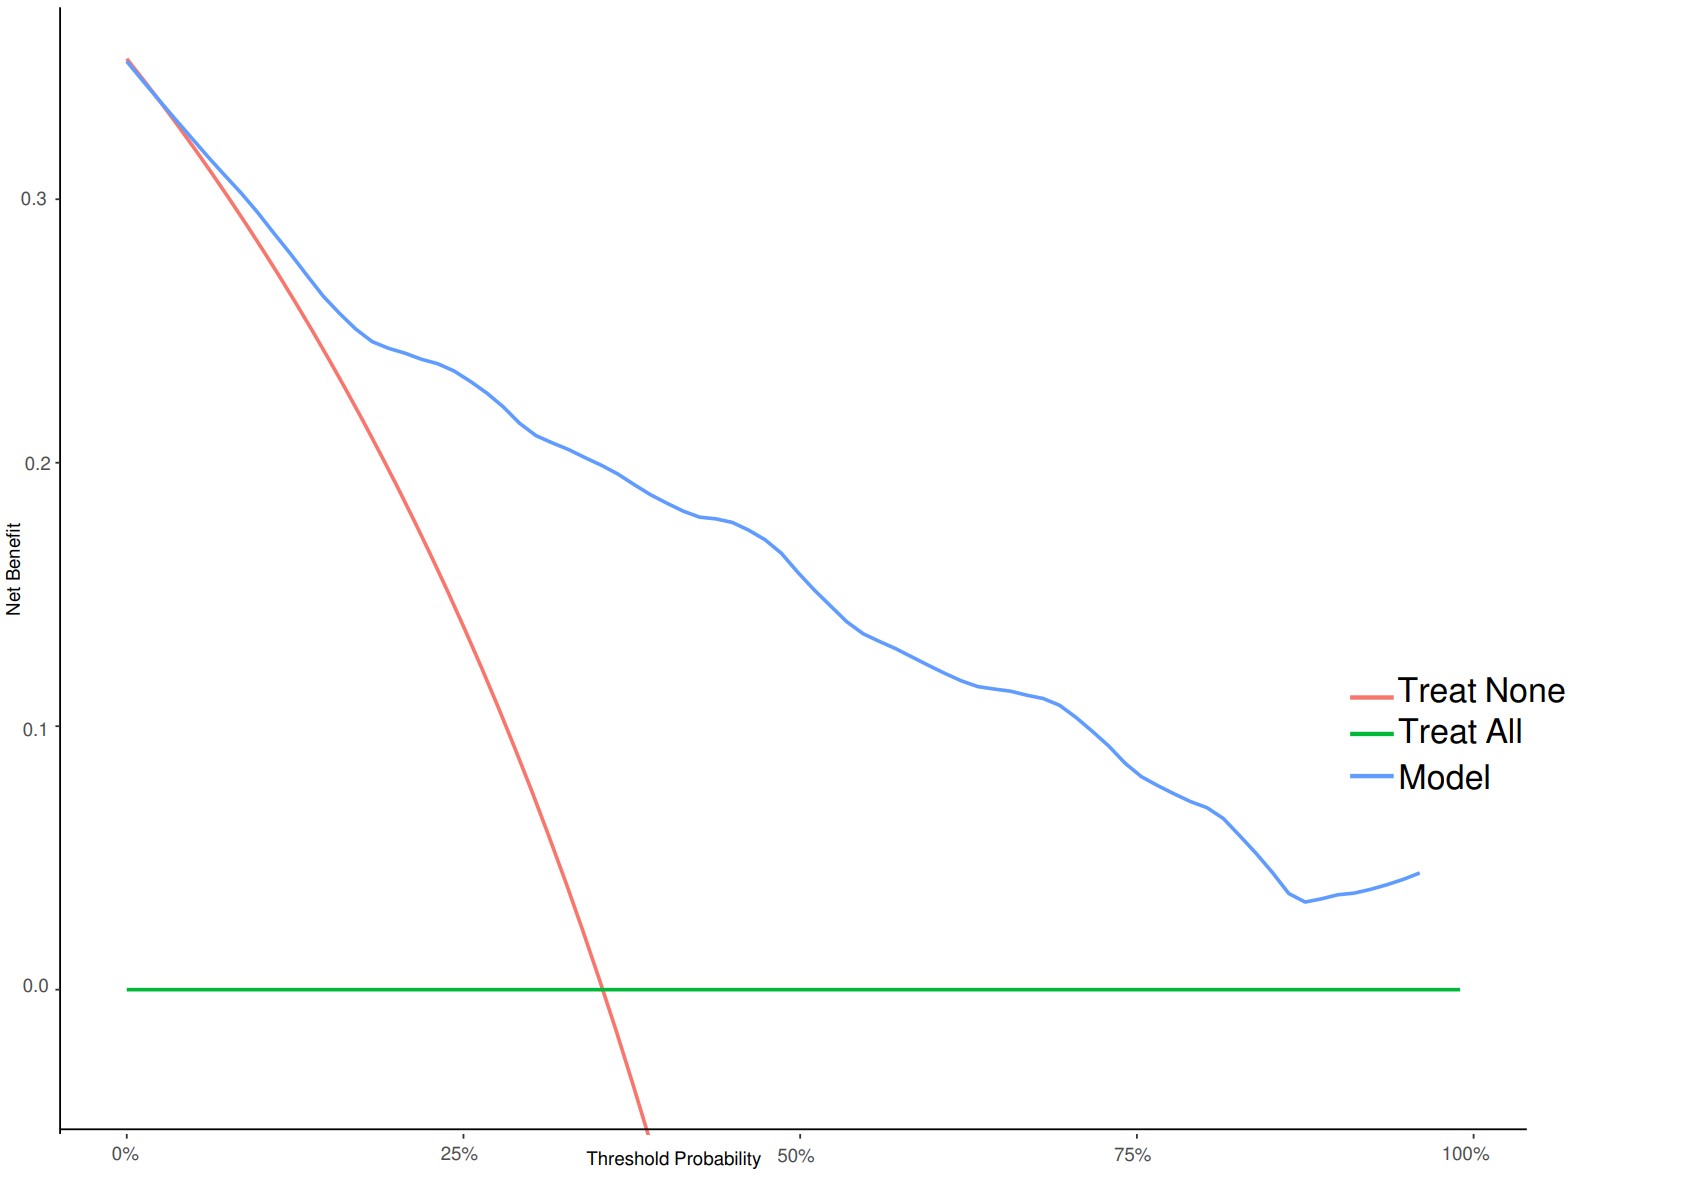


(**A**) (**B**) (**C**)

**Supplementary Figure S6** The DCA curves for 1- (A), 3- (B), and 5-year (C) OS in the training cohort.

**Supplementary Table S1** Baseline data comparison table for surviving and dying patients

| **Variables** | **Total (n = 357)** | **Survival (n = 239)** | **Dead (n = 118)** | **P** |
| --- | --- | --- | --- | --- |
| Age, Mean ± SD | 64.64 ± 11.59 | 63.20 ± 11.13 | 67.56 ± 12.01 | <.001 |
| Sex, n(%) |  |  |  | 0.363 |
| Female | 139 (38.94) | 97 (40.59) | 42 (35.59) |  |
| Male | 218 (61.06) | 142 (59.41) | 76 (64.41) |  |
| Hypertension, n(%) |  |  |  | 0.385 |
| No | 232 (64.99) | 159 (66.53) | 73 (61.86) |  |
| Yes | 125 (35.01) | 80 (33.47) | 45 (38.14) |  |
| Diabetes, n(%) |  |  |  | 0.941 |
| No | 314 (87.96) | 210 (87.87) | 104 (88.14) |  |
| Yes | 43 (12.04) | 29 (12.13) | 14 (11.86) |  |
| ASA grade, n(%) |  |  |  | 0.036 |
| 1 | 80 (22.41) | 55 (23.01) | 25 (21.19) |  |
| 2 | 194 (54.34) | 138 (57.74) | 56 (47.46) |  |
| 3 | 83 (23.25) | 46 (19.25) | 37 (31.36) |  |
| pT stage, n(%) |  |  |  | 0.068 |
| 1 | 210 (58.82) | 136 (56.90) | 74 (62.71) |  |
| 2 | 81 (22.69) | 61 (25.52) | 20 (16.95) |  |
| 3 | 50 (14.01) | 35 (14.64) | 15 (12.71) |  |
| 4 | 16 (4.48) | 7 (2.93) | 9 (7.63) |  |
| pN stage, n(%) |  |  |  | 0.005 |
| 0 | 230 (64.43) | 166 (69.46) | 64 (54.24) |  |
| 1 | 87 (24.37) | 54 (22.59) | 33 (27.97) |  |
| 2 | 40 (11.20) | 19 (7.95) | 21 (17.80) |  |
| TNM stage, n(%) |  |  |  | 0.014 |
| 1 | 187 (52.38) | 137 (57.32) | 50 (42.37) |  |
| 2 | 43 (12.04) | 29 (12.13) | 14 (11.86) |  |
| 3 | 127 (35.57) | 73 (30.54) | 54 (45.76) |  |
| Differentiation type, n(%) |  |  |  | <.001 |
| High | 18 (5.04) | 15 (6.28) | 3 (2.54) |  |
| Middle | 291 (81.51) | 204 (85.36) | 87 (73.73) |  |
| Low | 48 (13.45) | 20 (8.37) | 28 (23.73) |  |
| Nerve invasion, n(%) |  |  |  | <.001 |
| No | 281 (78.71) | 201 (84.10) | 80 (67.80) |  |
| Yes | 76 (21.29) | 38 (15.90) | 38 (32.20) |  |
| Vascular invasion, n(%) |  |  |  | 0.001 |
| No | 298 (83.47) | 210 (87.87) | 88 (74.58) |  |
| Yes | 59 (16.53) | 29 (12.13) | 30 (25.42) |  |
| Tumour size, n(%) |  |  |  | 0.154 |
| ≤3cm | 149 (41.74) | 106 (44.35) | 43 (36.44) |  |
| ＞3cm | 208 (58.26) | 133 (55.65) | 75 (63.56) |  |
| CEA, n(%) |  |  |  | <.001 |
| ≤5 µg/L | 228 (63.87) | 180 (75.31) | 48 (40.68) |  |
| ＞5 µg/L | 129 (36.13) | 59 (24.69) | 70 (59.32) |  |
| Surgical time, n(%) |  |  |  | <.001 |
| ≤240 min | 268 (75.07) | 203 (84.94) | 65 (55.08) |  |
| ＞240 min | 89 (24.93) | 36 (15.06) | 53 (44.92) |  |
| Postoperative hospital stay, n(%) |  |  |  | 0.187 |
| ≤10 days | 169 (47.34) | 119 (49.79) | 50 (42.37) |  |
| ＞10 days | 188 (52.66) | 120 (50.21) | 68 (57.63) |  |
| Chemotherapy, n(%) |  |  |  | 0.038 |
| No | 164 (45.94) | 119 (49.79) | 45 (38.14) |  |
| Yes | 193 (54.06) | 120 (50.21) | 73 (61.86) |  |
| Radiotherapy, n(%) |  |  |  | 0.598 |
| No | 287 (80.39) | 194 (81.17) | 93 (78.81) |  |
| Yes | 70 (19.61) | 45 (18.83) | 25 (21.19) |  |
| Platelet, Mean ± SD | 229.57 ± 71.91 | 225.64 ± 65.32 | 237.54 ± 83.44 | 0.176 |
| Monocyte, Mean ± SD | 0.47 ± 0.19 | 0.43 ± 0.16 | 0.55 ± 0.22 | <.001 |
| Neutrophile, Mean ± SD | 3.68 ± 1.30 | 3.48 ± 1.19 | 4.07 ± 1.42 | <.001 |
| Lymphocyte, Mean ± SD | 1.61 ± 0.86 | 1.63 ± 0.92 | 1.56 ± 0.71 | 0.5 |
| NLR, M (IQR) | 2.33 (1.75, 3.11) | 2.25 (1.67, 2.91) | 2.51 (1.91, 3.53) | 0.001 |
| PLR, M (IQR) | 146.11 (110.00, 201.11) | 140.50 (110.00, 192.85) | 166.33 (111.12, 211.15) | 0.13 |
| MLR, M(IQR) | 0.29 (0.22, 0.40) | 0.27 (0.20, 0.36) | 0.35 (0.27, 0.46) | <.001 |
| ICPI, Mean ± SD | 2.96 ± 2.82 | 2.32 ± 2.60 | 4.27 ± 2.79 | <.001 |

***ASA***: American Society of Anesthesiologists; ***NLR***: Neutrophil- to- Lymphocyte Ratio; ***PLR***: Platelet-Lymphocyte Ratio; ***MLR***: Monocyte Lymphocyte Ratio; ***ICPI***: Inflammation-Combined Prognostic Index; ***TNM*** stage: The 8th edition of the American Joint Committee on Cancer (AJCC) staging system; ***CEA***: carcinoembryonic antigen; ***IQR***: InterQuartile Range;
