# Supplementary material for: Prognostic Value of Preoperative ICPI in Rectal Cancer: A Nomogram Based Approach
Source: Research Square preprint supplement (doi:10.21203/rs.3.rs-7234131/v1), 2025-09-09
Supplement: Supplementary file 3 [file fc7aeb6c4b999d64dd4e128f.xlsx]

## Sheet: Sheet1
Table 1 Clinical characteristics in the training cohort and validation cohort.
Variables	Total (n = 357)	Training cohort (n = 249)	Validation cohort(n = 108)	P
Age, Mean ± SD	64.64 ± 11.59	65.33 ± 11.12	63.05 ± 12.52	0.087
Sex, n(%)				0.486
Female	139 (38.94)	94 (37.75)	45 (41.67)
Male	218 (61.06)	155 (62.25)	63 (58.33)
Hypertension, n(%)				0.598
No	232 (64.99)	164 (65.86)	68 (62.96)
Yes	125 (35.01)	85 (34.14)	40 (37.04)
Diabetes, n(%)				0.481
No	314 (87.96)	221 (88.76)	93 (86.11)
Yes	43 (12.04)	28 (11.24)	15 (13.89)
ASA grade, n(%)				0.461
1	80 (22.41)	59 (23.69)	21 (19.44)
2	194 (54.34)	130 (52.21)	64 (59.26)
3	83 (23.25)	60 (24.10)	23 (21.30)
pT stage, n(%)				0.785
1	210 (58.82)	145 (58.23)	65 (60.19)
2	81 (22.69)	56 (22.49)	25 (23.15)
3	50 (14.01)	35 (14.06)	15 (13.89)
4	16 (4.48)	13 (5.22)	3 (2.78)
pN stage, n(%)				0.601
0	230 (64.43)	163 (65.46)	67 (62.04)
1	87 (24.37)	57 (22.89)	30 (27.78)
2	40 (11.20)	29 (11.65)	11 (10.19)
TNM stage, n(%)				0.704
1	187 (52.38)	131 (52.61)	56 (51.85)
2	43 (12.04)	32 (12.85)	11 (10.19)
3	127 (35.57)	86 (34.54)	41 (37.96)
Differentiation type, n(%)				0.712
High	18 (5.04)	11 (4.42)	7 (6.48)
Middle	291 (81.51)	204 (81.93)	87 (80.56)
Low	48 (13.45)	34 (13.65)	14 (12.96)
Nerve invasion, n(%)				0.261
No	281 (78.71)	192 (77.11)	89 (82.41)
Yes	76 (21.29)	57 (22.89)	19 (17.59)
Vascular invasion, n(%)				0.963
No	298 (83.47)	208 (83.53)	90 (83.33)
Yes	59 (16.53)	41 (16.47)	18 (16.67)
Tumour size, n(%)				0.359
≤3cm	149 (41.74)	100 (40.16)	49 (45.37)
＞3cm	208 (58.26)	149 (59.84)	59 (54.63)
CEA, n(%)				0.476
≤5 µg/L	228 (63.87)	162 (65.06)	66 (61.11)
＞5 µg/L	129 (36.13)	87 (34.94)	42 (38.89)
Surgical time, n(%)				0.278
≤240 min	268 (75.07)	191 (76.71)	77 (71.30)
＞240 min	89 (24.93)	58 (23.29)	31 (28.70)
Postoperative hospital stay, n(%)				0.341
≤10 days	169 (47.34)	122 (49.00)	47 (43.52)
＞10 days	188 (52.66)	127 (51.00)	61 (56.48)
Chemotherapy, n(%)				0.434
No	164 (45.94)	111 (44.58)	53 (49.07)
Yes	193 (54.06)	138 (55.42)	55 (50.93)
Radiotherapy, n(%)				0.959
No	287 (80.39)	200 (80.32)	87 (80.56)
Yes	70 (19.61)	49 (19.68)	21 (19.44)
ICPI, n(%)				0.194
≤4.3	174 (48.74)	127 (51.00)	47 (43.52)
＞4.3	183 (51.26)	122 (49.00)	61 (56.48)
ASA: American Society of Anesthesiologists; ICPI: Inflammation-Combined Prognostic Index; TNM stage: The 8th edition of the American Joint Committee on Cancer (AJCC) staging system; CEA: carcinoembryonic antigen
